# Supplementary material for: Estimation Standard And Seeded Pan Evaporation Using Modelling Approach
Source: Copernicus journal article supplement (doi:10.5194/hess-2021-590), 2021-12-01
Supplement: Supplementary file [file hess-2021-590-RC4-supplement.pdf]

## **TITLE:** Estimation Standard And Seeded Pan Evaporation Using Modelling

Approach

### **Reviewers' comments:**

In this paper, K-SOM and other methods are used to improve the estimation of lake evaporation, which is conducive to accurately estimate the total lake evaporation and improve the climate effect of the lake under the background of climate change. I recommend publication of the paper in HESS after revision.

### **Major comments**

Has this article been studied by simulation at Keszthely, Hungary. However, how do you consider the effect of the evaporation of non-uniform underlying surfaces, such as mountains, and grass?

This paper improves the calculation method of lake evaporation, and further analysis of lake evaporation and its climate effects are needed on the Lake Balaton in the future.

### **Minor comments**

Figure 1 should be topography.

L.47 The unsupervised NNs, including Kohonen Self Organizing Maps (K-SOM), has several advantages (Kohonen, 1982). Full name should be given for the first occurrence 'NN'.

L.16-20 Performances of the different models were compared using statistical indices, which included the root mean square error (RMSE), mean absolute error (MAE), scatter index (SI) and Nash-Sutcliffe efficiency (NSE). The results showed that the MLR method provided close compliance with the observed pan evaporation values, but the K-SOM method gave better estimates than the other methods. Overall, K-SOM has high accuracy and huge potential for  $E_p$  estimation for water bodies 20 where freshwater submerged macrophytes are present. This section need to be rewrite.

L.84 (latitude: 46°44'N, longitude: 17°14'E, elevation: 124 m above sea level) 'above sea level' Can be abbreviated as a.s.l.

L.231 From the figure, it can be observed that most of the estimated daily  $E_p$  values are close to the observed daily  $E_p$  values for all three pan treatments.

Which figure?

Many researchers have conducted research with neural networks aimed at the estimation of  $E_p$  as a function of meteorological variables (Keskin and Terzi, 2006). Several of these researchers found better results in  $E_p$  estimation with neural network than those obtained from the Priestley-Taylor and the Penman methods (Rahimikhoob, 2009; Malik et al., 2020). Consistent with other studies, this study demonstrated that modelling of  $E_p$  is possible through the use of K-SOM technique in addition to the 275 FAO56-PM and MLR methods. The comparison results indicated that, in general, the K-SOM model was superior to the FAO56-PM and MLR methods. Chang et al. (2010) used

different methods to estimate pan evaporation, including also the KSOM and the FAO56-PM. According to the results of Chang et al. (2010), K-SOM was the best of the studied methods, and it was found that the Penman-Monteith method is also likely to underestimate evaporation. Malik et al. (2017) used four heuristic approaches and two climate-based models to approximate monthly pan evaporation, where the K-SOM model performed better than the climate-based models. The regression line in scatter plots has R<sup>2</sup> as 0.937 for K-SOM model at Pantnagar and Ranichauri (India), respectively. In the study of Malik et al. (2017), RMSE values were 0.685 and 1.126 for K-SOM, when 50% of the total available data was used in the testing of models in two stations. This section should be put in the introduction.

Line 280 The regression line in scatter plots has R<sup>2</sup> as 0.937 for K-SOM model at Pantnagar and Ranichauri (India), respectively. 'Respectively' can be deleted.

Can the confidence of the correlation coefficient pass the significance test?
